# Supplementary material for: TPX2 upregulates MMP13 to promote the progression of lipopolysaccharide-induced osteoarthritis
Source: PeerJ journal article supplement (doi:10.7717/peerj.17032), 2024-05-17
Supplement: Figure_3hubgene_GSEA_StaffRL.zip [file Figure_3hubgene_GSEA_StaffRL.zip]

## Sheet: Sheet1
Term	ES	NES	pvalue	FDR	FWER
RNA_DEGRADATION	-0.5545	-1.7858	0	0.1252	0.164
BASAL_TRANSCRIPTION_FACTORS	-0.5427	-1.7547	0.0076	0.0917	0.229
SPLICEOSOME	-0.4931	-1.5962	0.0122	0.2455	0.625
WNT_SIGNALING_PATHWAY	-0.2939	-1.3743	0.0174	0.6043	0.95
BASE_EXCISION_REPAIR	0.5101	1.6737	0.0184	0.3648	0.406
OTHER_GLYCAN_DEGRADATION	0.7067	1.7176	0.0247	0.6763	0.302
PROGESTERONE_MEDIATED_OOCYTE_MATURATION	0.3815	1.5671	0.0264	0.3223	0.66
ALLOGRAFT_REJECTION	0.6005	1.6492	0.0332	0.3455	0.469
FC_EPSILON_RI_SIGNALING_PATHWAY	0.3917	1.5355	0.0365	0.3394	0.726
RIBOSOME	-0.4045	-1.6383	0.0426	0.2237	0.511
BIOSYNTHESIS_OF_UNSATURATED_FATTY_ACIDS	0.4865	1.4956	0.0428	0.3349	0.797
UBIQUITIN_MEDIATED_PROTEOLYSIS	-0.3785	-1.5199	0.0431	0.3695	0.784
GLUTATHIONE_METABOLISM	0.4331	1.4775	0.0441	0.3358	0.821
TGF_BETA_SIGNALING_PATHWAY	-0.3914	-1.444	0.0469	0.4508	0.881
LYSOSOME	0.5774	1.7054	0.0504	0.3903	0.331
SYSTEMIC_LUPUS_ERYTHEMATOSUS	0.5418	1.6128	0.0531	0.3886	0.56
AUTOIMMUNE_THYROID_DISEASE	0.5059	1.5731	0.0633	0.3414	0.644
TYPE_I_DIABETES_MELLITUS	0.5192	1.578	0.0639	0.3748	0.635
GLYCOSPHINGOLIPID_BIOSYNTHESIS_GLOBO_SERIES	0.5967	1.538	0.064	0.3665	0.722
VIBRIO_CHOLERAE_INFECTION	0.4251	1.4989	0.0643	0.3493	0.79
FC_GAMMA_R_MEDIATED_PHAGOCYTOSIS	0.4329	1.5146	0.0653	0.3654	0.761
ARACHIDONIC_ACID_METABOLISM	0.4091	1.415	0.0828	0.4143	0.912
CIRCADIAN_RHYTHM_MAMMAL	-0.6591	-1.4782	0.0842	0.4132	0.841
EPITHELIAL_CELL_SIGNALING_IN_HELICOBACTER_PYLORI_INFECTION	0.3506	1.3494	0.085	0.4258	0.956
NATURAL_KILLER_CELL_MEDIATED_CYTOTOXICITY	0.3507	1.3735	0.0857	0.4296	0.942
ASTHMA	0.5621	1.5797	0.0876	0.4329	0.633
GLYCOSAMINOGLYCAN_BIOSYNTHESIS_HEPARAN_SULFATE	0.4588	1.4144	0.0877	0.3968	0.912
GLYCOSAMINOGLYCAN_BIOSYNTHESIS_KERATAN_SULFATE	0.5302	1.4277	0.0909	0.4015	0.895
B_CELL_RECEPTOR_SIGNALING_PATHWAY	0.341	1.3936	0.0913	0.3962	0.932
DORSO_VENTRAL_AXIS_FORMATION	-0.4498	-1.3577	0.0921	0.59	0.958
GLYCOSPHINGOLIPID_BIOSYNTHESIS_GANGLIO_SERIES	0.5998	1.4902	0.0962	0.3274	0.811
SULFUR_METABOLISM	0.6745	1.4006	0.1048	0.4122	0.927
GLYCOSAMINOGLYCAN_DEGRADATION	0.6185	1.5071	0.1064	0.3536	0.77
N_GLYCAN_BIOSYNTHESIS	0.459	1.452	0.1102	0.359	0.867
PRIMARY_IMMUNODEFICIENCY	0.4352	1.3984	0.1155	0.4004	0.929
NON_SMALL_CELL_LUNG_CANCER	0.303	1.2441	0.1227	0.5964	0.992
GRAFT_VERSUS_HOST_DISEASE	0.5465	1.4605	0.1303	0.3562	0.853
RENIN_ANGIOTENSIN_SYSTEM	0.4172	1.281	0.142	0.5589	0.986
HEMATOPOIETIC_CELL_LINEAGE	0.3408	1.2823	0.1423	0.5732	0.986
ANTIGEN_PROCESSING_AND_PRESENTATION	0.3824	1.3693	0.1548	0.4239	0.944
CELL_ADHESION_MOLECULES_CAMS	0.338	1.275	0.1579	0.5585	0.987
INTESTINAL_IMMUNE_NETWORK_FOR_IGA_PRODUCTION	0.4388	1.3687	0.1612	0.4102	0.944
ENDOCYTOSIS	0.2492	1.1947	0.1684	0.6582	0.999
SPHINGOLIPID_METABOLISM	0.4716	1.3599	0.1736	0.4156	0.949
VIRAL_MYOCARDITIS	0.3637	1.2364	0.1903	0.6025	0.994
GALACTOSE_METABOLISM	0.3991	1.2508	0.1939	0.594	0.991
LEISHMANIA_INFECTION	0.4113	1.3082	0.1971	0.5162	0.98
CHEMOKINE_SIGNALING_PATHWAY	0.3192	1.2527	0.2097	0.6053	0.991
MAPK_SIGNALING_PATHWAY	-0.2586	-1.1487	0.2103	1	1
PROSTATE_CANCER	-0.296	-1.2006	0.219	1	0.998
HEDGEHOG_SIGNALING_PATHWAY	-0.2857	-1.1592	0.222	1	1
MELANOMA	-0.2627	-1.1111	0.2257	1	1
REGULATION_OF_ACTIN_CYTOSKELETON	0.2443	1.1259	0.2349	0.7323	1
PPAR_SIGNALING_PATHWAY	0.3639	1.2261	0.2352	0.6165	0.997
ALPHA_LINOLENIC_ACID_METABOLISM	0.4293	1.197	0.2444	0.6846	0.999
TASTE_TRANSDUCTION	0.3253	1.158	0.247	0.7351	1
COLORECTAL_CANCER	0.3026	1.1783	0.248	0.691	1
OOCYTE_MEIOSIS	0.2637	1.1347	0.248	0.7558	1
AMYOTROPHIC_LATERAL_SCLEROSIS_ALS	0.2717	1.1296	0.261	0.7383	1
PANCREATIC_CANCER	0.2765	1.1525	0.2642	0.7359	1
TYPE_II_DIABETES_MELLITUS	0.3098	1.1218	0.2668	0.7286	1
LEUKOCYTE_TRANSENDOTHELIAL_MIGRATION	0.2863	1.1335	0.2701	0.7434	1
PYRIMIDINE_METABOLISM	0.289	1.1503	0.271	0.7255	1
RENAL_CELL_CARCINOMA	-0.2934	-1.1246	0.2874	1	1
PROTEIN_EXPORT	-0.4455	-1.2198	0.2901	1	0.996
DNA_REPLICATION	0.3901	1.1951	0.2936	0.6731	0.999
GLYCOSYLPHOSPHATIDYLINOSITOL_GPI_ANCHOR_BIOSYNTHESIS	0.3229	1.0822	0.3228	0.7957	1
ARRHYTHMOGENIC_RIGHT_VENTRICULAR_CARDIOMYOPATHY_ARVC	-0.2951	-1.0677	0.3299	1	1
MTOR_SIGNALING_PATHWAY	-0.3001	-1.1032	0.3327	1	1
PORPHYRIN_AND_CHLOROPHYLL_METABOLISM	0.3412	1.1082	0.3354	0.7517	1
T_CELL_RECEPTOR_SIGNALING_PATHWAY	0.2334	1.0577	0.3424	0.8085	1
LIMONENE_AND_PINENE_DEGRADATION	0.4546	1.1007	0.3528	0.7587	1
GLYCINE_SERINE_AND_THREONINE_METABOLISM	0.3376	1.0662	0.3596	0.812	1
SNARE_INTERACTIONS_IN_VESICULAR_TRANSPORT	0.3184	1.0655	0.3782	0.7996	1
ERBB_SIGNALING_PATHWAY	-0.2668	-1.0428	0.3804	1	1
LYSINE_DEGRADATION	0.2803	1.0385	0.3852	0.8342	1
HOMOLOGOUS_RECOMBINATION	-0.2692	-1.0531	0.3869	1	1
COMPLEMENT_AND_COAGULATION_CASCADES	0.298	1.054	0.387	0.8063	1
ENDOMETRIAL_CANCER	-0.2775	-1.0484	0.3909	1	1
HISTIDINE_METABOLISM	0.2959	1.0349	0.4073	0.8167	1
FRUCTOSE_AND_MANNOSE_METABOLISM	0.341	1.0374	0.413	0.8234	1
BETA_ALANINE_METABOLISM	0.4015	1.0662	0.417	0.8267	1
PROTEASOME	-0.3319	-1.0257	0.432	1	1
CYSTEINE_AND_METHIONINE_METABOLISM	-0.2791	-1.0022	0.4369	1	1
PATHWAYS_IN_CANCER	-0.2165	-1.0046	0.4402	1	1
ADIPOCYTOKINE_SIGNALING_PATHWAY	0.2979	1.0029	0.4451	0.8758	1
DRUG_METABOLISM_OTHER_ENZYMES	0.2714	0.9928	0.4479	0.8629	1
PRION_DISEASES	0.3046	0.9761	0.4564	0.8838	1
PEROXISOME	0.2633	0.972	0.4636	0.8821	1
CYTOKINE_CYTOKINE_RECEPTOR_INTERACTION	0.2226	0.9961	0.4639	0.8802	1
ALDOSTERONE_REGULATED_SODIUM_REABSORPTION	0.2791	0.995	0.4675	0.8699	1
NITROGEN_METABOLISM	-0.2909	-0.9969	0.4692	1	1
CHRONIC_MYELOID_LEUKEMIA	0.2608	0.9847	0.4705	0.8724	1
GLYCOSAMINOGLYCAN_BIOSYNTHESIS_CHONDROITIN_SULFATE	0.3894	1.0118	0.4721	0.8645	1
METABOLISM_OF_XENOBIOTICS_BY_CYTOCHROME_P450	0.265	0.9641	0.4852	0.8679	1
GLIOMA	0.248	0.9585	0.5082	0.8695	1
AMINO_SUGAR_AND_NUCLEOTIDE_SUGAR_METABOLISM	0.3229	0.9672	0.5115	0.8837	1
PENTOSE_AND_GLUCURONATE_INTERCONVERSIONS	0.3265	0.9644	0.5133	0.879	1
RIBOFLAVIN_METABOLISM	0.3315	0.933	0.5202	0.8989	1
VASOPRESSIN_REGULATED_WATER_REABSORPTION	0.2483	0.9448	0.522	0.8924	1
P53_SIGNALING_PATHWAY	0.2624	0.9295	0.5241	0.8964	1
HYPERTROPHIC_CARDIOMYOPATHY_HCM	-0.3432	-0.9823	0.53	1	1
BASAL_CELL_CARCINOMA	-0.2372	-0.9743	0.5366	1	1
CELL_CYCLE	-0.2369	-0.9245	0.5506	1	1
AXON_GUIDANCE	0.2286	0.944	0.5521	0.8828	1
GLYCEROLIPID_METABOLISM	0.2659	0.9286	0.5528	0.8871	1
REGULATION_OF_AUTOPHAGY	-0.2638	-0.9331	0.565	1	1
ABC_TRANSPORTERS	-0.2338	-0.9522	0.5708	1	1
INOSITOL_PHOSPHATE_METABOLISM	-0.2395	-0.9126	0.578	1	1
BUTANOATE_METABOLISM	0.3286	0.9078	0.5783	0.8934	1
TERPENOID_BACKBONE_BIOSYNTHESIS	-0.3365	-0.8826	0.5843	1	1
TAURINE_AND_HYPOTAURINE_METABOLISM	0.3348	0.9188	0.5855	0.8885	1
NEUROTROPHIN_SIGNALING_PATHWAY	0.2374	0.9019	0.5927	0.8859	1
ETHER_LIPID_METABOLISM	0.2789	0.9005	0.5928	0.8792	1
VEGF_SIGNALING_PATHWAY	0.2278	0.9087	0.6033	0.9019	1
TIGHT_JUNCTION	-0.25	-0.887	0.6037	1	1
NUCLEOTIDE_EXCISION_REPAIR	-0.2332	-0.885	0.6098	1	1
NOD_LIKE_RECEPTOR_SIGNALING_PATHWAY	-0.2575	-0.8593	0.6128	0.9764	1
JAK_STAT_SIGNALING_PATHWAY	0.2125	0.8998	0.6172	0.8707	1
PHOSPHATIDYLINOSITOL_SIGNALING_SYSTEM	0.2237	0.9199	0.6227	0.897	1
FOCAL_ADHESION	0.2078	0.8943	0.6237	0.8631	1
STEROID_BIOSYNTHESIS	0.2942	0.869	0.6293	0.871	1
ACUTE_MYELOID_LEUKEMIA	0.2318	0.8749	0.6364	0.897	1
PURINE_METABOLISM	0.2044	0.8708	0.6379	0.8863	1
PATHOGENIC_ESCHERICHIA_COLI_INFECTION	0.2673	0.8508	0.6395	0.8924	1
CITRATE_CYCLE_TCA_CYCLE	0.402	0.8701	0.6415	0.8781	1
PYRUVATE_METABOLISM	0.3276	0.8447	0.6473	0.8957	1
AMINOACYL_TRNA_BIOSYNTHESIS	-0.2665	-0.8784	0.6486	0.9864	1
NICOTINATE_AND_NICOTINAMIDE_METABOLISM	0.2857	0.8734	0.6545	0.8904	1
TOLL_LIKE_RECEPTOR_SIGNALING_PATHWAY	0.2365	0.8597	0.6569	0.8831	1
RNA_POLYMERASE	0.2616	0.8389	0.6589	0.8981	1
ADHERENS_JUNCTION	-0.2242	-0.862	0.68	0.997	1
GNRH_SIGNALING_PATHWAY	0.2118	0.9076	0.6902	0.8832	1
MISMATCH_REPAIR	0.261	0.8068	0.6932	0.9162	1
NON_HOMOLOGOUS_END_JOINING	0.2994	0.7897	0.6979	0.8795	1
LONG_TERM_DEPRESSION	-0.2064	-0.8815	0.7264	1	1
STARCH_AND_SUCROSE_METABOLISM	0.2738	0.831	0.7302	0.9057	1
SMALL_CELL_LUNG_CANCER	-0.2233	-0.8033	0.7302	1	1
ALANINE_ASPARTATE_AND_GLUTAMATE_METABOLISM	-0.2614	-0.8173	0.7364	1	1
GLYCEROPHOSPHOLIPID_METABOLISM	0.2129	0.8171	0.7431	0.9151	1
APOPTOSIS	0.2125	0.8277	0.7474	0.9037	1
NEUROACTIVE_LIGAND_RECEPTOR_INTERACTION	0.1927	0.8993	0.7524	0.8619	1
INSULIN_SIGNALING_PATHWAY	0.2114	0.8062	0.7526	0.9087	1
VALINE_LEUCINE_AND_ISOLEUCINE_DEGRADATION	-0.24	-0.739	0.7526	1	1
HUNTINGTONS_DISEASE	0.238	0.7995	0.7583	0.9116	1
O_GLYCAN_BIOSYNTHESIS	0.2648	0.7914	0.764	0.8841	1
VASCULAR_SMOOTH_MUSCLE_CONTRACTION	0.2066	0.7964	0.7682	0.9086	1
ONE_CARBON_POOL_BY_FOLATE	0.2512	0.7928	0.7688	0.8979	1
FATTY_ACID_METABOLISM	0.2724	0.7222	0.7689	0.9438	1
PANTOTHENATE_AND_COA_BIOSYNTHESIS	-0.2681	-0.777	0.7706	1	1
LONG_TERM_POTENTIATION	0.2223	0.7922	0.7984	0.8908	1
THYROID_CANCER	-0.2185	-0.7536	0.809	1	1
VALINE_LEUCINE_AND_ISOLEUCINE_BIOSYNTHESIS	0.3092	0.718	0.8119	0.9414	1
FOLATE_BIOSYNTHESIS	-0.2706	-0.7098	0.8145	1	1
TRYPTOPHAN_METABOLISM	0.2138	0.8103	0.8304	0.9189	1
SELENOAMINO_ACID_METABOLISM	0.2089	0.7229	0.8411	0.9511	1
OXIDATIVE_PHOSPHORYLATION	0.2707	0.6794	0.8424	0.9465	1
NOTCH_SIGNALING_PATHWAY	0.1906	0.7826	0.8463	0.8836	1
PROXIMAL_TUBULE_BICARBONATE_RECLAMATION	0.2628	0.7135	0.8504	0.9311	1
CYTOSOLIC_DNA_SENSING_PATHWAY	-0.1971	-0.752	0.8574	1	1
PENTOSE_PHOSPHATE_PATHWAY	0.2239	0.7257	0.863	0.9552	1
PHENYLALANINE_METABOLISM	-0.2576	-0.6702	0.863	0.9817	1
DILATED_CARDIOMYOPATHY	-0.2332	-0.6971	0.8729	1	1
MELANOGENESIS	0.1811	0.7961	0.8752	0.9003	1
BLADDER_CANCER	-0.21	-0.7649	0.8767	1	1
ARGININE_AND_PROLINE_METABOLISM	0.2135	0.7436	0.8818	0.9382	1
PROPANOATE_METABOLISM	-0.2706	-0.7057	0.8917	1	1
RETINOL_METABOLISM	-0.1923	-0.66	0.9098	0.9538	1
LINOLEIC_ACID_METABOLISM	-0.2117	-0.6751	0.9115	1	1
RIG_I_LIKE_RECEPTOR_SIGNALING_PATHWAY	0.1709	0.7143	0.9312	0.938	1
DRUG_METABOLISM_CYTOCHROME_P450	0.1806	0.7035	0.9322	0.9346	1
GLYCOLYSIS_GLUCONEOGENESIS	0.199	0.6337	0.9335	0.9791	1
GLYOXYLATE_AND_DICARBOXYLATE_METABOLISM	-0.2468	-0.5604	0.9346	0.9846	1
GAP_JUNCTION	-0.1641	-0.703	0.9458	1	1
ECM_RECEPTOR_INTERACTION	-0.1787	-0.6712	0.9525	1	1
TYROSINE_METABOLISM	-0.194	-0.6486	0.9539	0.9466	1
ASCORBATE_AND_ALDARATE_METABOLISM	0.1978	0.5815	0.9542	0.9962	1
STEROID_HORMONE_BIOSYNTHESIS	0.1848	0.6811	0.9554	0.9528	1
OLFACTORY_TRANSDUCTION	-0.1689	-0.6635	0.9608	0.9688	1
PRIMARY_BILE_ACID_BIOSYNTHESIS	0.2072	0.5445	0.9664	1	1
CALCIUM_SIGNALING_PATHWAY	0.1646	0.629	0.9865	0.9748	1
ALZHEIMERS_DISEASE	0.1609	0.5068	0.9865	1	1
PARKINSONS_DISEASE	0.1724	0.3999	0.9885	1	1
CARDIAC_MUSCLE_CONTRACTION	-0.1562	-0.355	0.9979	0.9994	1
MATURITY_ONSET_DIABETES_OF_THE_YOUNG	0.1248	0.3943	1	0.9981	1
GLYCOSPHINGOLIPID_BIOSYNTHESIS_LACTO_AND_NEOLACTO_SERIES	0.1334	0.4482	1	1	1
