# Supplementary material for: TPX2 upregulates MMP13 to promote the progression of lipopolysaccharide-induced osteoarthritis
Source: PeerJ journal article supplement (doi:10.7717/peerj.17032), 2024-05-17
Supplement: Figure_4hubgene_ROC_StaffRL.zip [file Figure_4hubgene_ROC_StaffRL.zip]

## Sheet: Sheet1
Gene	U2AF2
OA	529.47
OA	402.38
OA	278.98
OA	505.39
OA	395.18
OA	480.48
OA	315.83
OA	354.39
OA	283.89
Normal	273.84
Normal	325.86
Normal	281.22
Normal	264.04
Normal	325.22
Normal	266.99
Normal	211.38
