# Supplementary material for: TPX2 upregulates MMP13 to promote the progression of lipopolysaccharide-induced osteoarthritis
Source: PeerJ. 2024 May 17;12:e17032. doi: 10.7717/peerj.17032 (PMC11104344; doi:10.7717/peerj.17032)
Supplement: Supplemental Information 6 — qRT-PCR detected TPX2 mRNA expression levels in C28/I2 cells treated with 5ug/mL LPS and TPX2 knockdown (Figure 5D). [file peerj-12-17032-s006.xlsx]

## Sheet: Sheet1
Figure 5A
	GAPDH				TPX2			△Ct	△△Ct	2-△△Ct
	0	18.01				22.12
		17.98				22.31
		18.01	18			22.53	22.32	4.32	0	1
	1	19.25				22.01
		18.95				23.15
		18.98	19.06			23.22	22.7933	3.73333	-0.586667	1.50177
	5	19.95				23.15
		19.87				23.05
		19.99	19.9367			23.02	23.0733	3.13667	-1.18333	2.27101
	10	19.23				22.02
		19.15				22.05
		20.25	19.5433			22.26	22.11	2.56667	-1.75333	3.37137
Figure 5D
	GAPDH				TPX2			△Ct	△△Ct	2-△△Ct
	control	18.01				22.12
		17.98				22.31
		18.01	18			22.53	22.32	4.32	0	1
	LPS	19.25				22.01
		19.95				22.95
		19.98	19.7267			23.22	22.7267	3	-1.32	2.49666
	LPS+si-NC	19.95				23.1
		19.87				23.05
		19.99	19.9367			23.02	23.0567	3.12	-1.2	2.2974
	LPS+si-TPX2	19.23				23.02
		19.15				23.05
		20.25	19.5433			23.26	23.11	3.56667	-0.753333	1.68568
