# Supplementary material for: TPX2 upregulates MMP13 to promote the progression of lipopolysaccharide-induced osteoarthritis
Source: PeerJ. 2024 May 17;12:e17032. doi: 10.7717/peerj.17032 (PMC11104344; doi:10.7717/peerj.17032)
Supplement: Supplemental Information 12 — C28/I2 cell proliferation activity detection after 5ug/mL LPS and TPX2 knockdown (Figure 5E). ELISA detects the secretion levels of inflammatory cytokines in C28/I2 cells after LPS treatment and TPX2 knockdown (Figures 5H–5J). [file peerj-12-17032-s012.xlsx]

## Sheet: Sheet1
	Figure 5C
			1	2	3	AVE	SD	1	2	3	AVE	SD
		0μg/ml	0.0609	0.107702	0.13	0.099534	0.0287951	1.36806	1.23017	1.25536	1.28453	0.0599558
		1μg/ml	0.0265	0.08543	0.1898	0.100577	0.0675218	1.03341	1.03713	1.09338	1.05464	0.0274374
		5μg/ml	0.07706	0.0827	0.13222	0.0973267	0.0247805	0.696587	0.681922	0.844991	0.741167	0.0736584
		10μg/ml	0.036002	0.0892	0.1752	0.100134	0.0573509	0.4087	0.396641	0.458679	0.42134	0.026858
			0h
		0μg/ml	0.10569	0.156122	0.18545	450		1.4664	1.32737	1.32386	450
			0.04479	0.04842	0.05545	630		0.09834	0.0972	0.0685	630
		1μg/ml	0.11316	0.156533	0.28317	450		1.13172	1.11053	1.14188	450
			0.08666	0.071103	0.09337	630		0.09831	0.0734	0.0485	630
		5μg/ml	0.15549	0.14471	0.18179	450		0.752347	0.778522	0.918791	450
			0.07843	0.06201	0.04957	630		0.05576	0.0966	0.0738	630
		10μg/ml	0.09478	0.18815	0.27021	450		0.4829	0.490741	0.545579	450
			0.058778	0.09895	0.09501	630		0.0742	0.0941	0.0869	630
	Figure 5E
			1	2	3	AVE	SD	1	2	3	AVE	SD
		0μg/ml	0.083725	0.114	0.103	0.100242	0.0125127	1.10954	0.985424	1.02963	1.04153	0.0513651
		1μg/ml	0.06879	0.0863	0.144	0.0996967	0.0321324	0.532018	0.561362	0.62898	0.57412	0.0405998
		5μg/ml	0.0894	0.0833	0.129	0.100567	0.020259	0.502059	0.496705	0.586685	0.528483	0.0412129
		10μg/ml	0.0421	0.089755	0.167	0.0996183	0.051465	0.764095	0.759313	0.913941	0.81245	0.0717919
			0h
		0μg/ml	0.18875	0.16023	0.1898	450		1.18972	1.05167	1.09053	450
			0.105025	0.04623	0.0868	630		0.08018	0.06625	0.0609	630
		1μg/ml	0.114957	0.16817	0.1981	450		0.617818	0.628062	0.68348	450
			0.046167	0.08187	0.0541	630		0.0858	0.0667	0.0545	630
		5μg/ml	0.16542	0.15766	0.215	450		0.58329	0.572705	0.662035	450
			0.07602	0.07436	0.086	630		0.08123	0.076	0.07535	630
		10μg/ml	0.14313	0.1465	0.2474	450		0.843365	0.824883	0.999781	450
			0.10103	0.056745	0.0804	630		0.07927	0.06557	0.08584	630
	Figure 5H-J
	IL-1β		1	2	3	AVE	SD
		control	72.3021	61.4948	78.1883	70.6617	6.91309
		LPS	602.012	666.588	656.546	641.716	28.3725
		LPS+si-NC	644.511	589.905	613.564	615.993	22.3589
		LPS+si-TPX2	401.261	443.965	394.36	413.196	21.9392
	IL-6		1	2	3	AVE	SD
		control	88.4927	68.4456	72.4594	76.4659	8.66066
		LPS	484.014	507.148	530.218	507.127	18.8627
		LPS+si-NC	492.844	467.804	504.573	488.407	15.3352
		LPS+si-TPX2	301.97	355.734	315.472	324.392	22.8372
	TNF-α		1	2	3	AVE	SD
		control	102.193	121.786	133.999	119.326	13.1009
		LPS	703.546	733.717	763.83	733.698	24.6108
		LPS+si-NC	712.789	722.109	754.377	729.758	17.8189
		LPS+si-TPX2	503.353	537.514	514.913	518.593	14.1871
