# Supplementary material for: TPX2 upregulates MMP13 to promote the progression of lipopolysaccharide-induced osteoarthritis
Source: PeerJ. 2024 May 17;12:e17032. doi: 10.7717/peerj.17032 (PMC11104344; doi:10.7717/peerj.17032)
Supplement: Supplemental Information 13 [file peerj-12-17032-s013.xlsx]

## Sheet: Sheet1
Figure 6B			1	2	3	AVE	SD
	TPX2	Nuclear	71.0868	81.5925	70.3488	74.3427	6.28931
		cytoplasmic	28.9132	22.4075	25.6512	25.6573	3.25281
	MMP13	Nuclear	83.7549	77.6823	84.7564	82.0645	3.82801
		cytoplasmic	17.2451	21.3177	15.2436	17.9355	3.09533
	PAGDH	Nuclear	23.9113	29.233	26.0991	26.4145	2.67482
		cytoplasmic	74.0887	72.767	73.9009	73.5855	0.715043
	U1	Nuclear	76.0789	77.3402	81.281	78.2333	2.71362
		cytoplasmic	22.9211	23.6598	18.719	21.7667	2.66504
