# Supplementary material for: TPX2 upregulates MMP13 to promote the progression of lipopolysaccharide-induced osteoarthritis
Source: PeerJ. 2024 May 17;12:e17032. doi: 10.7717/peerj.17032 (PMC11104344; doi:10.7717/peerj.17032)
Supplement: Supplemental Information 14 [file peerj-12-17032-s014.xlsx]

## Sheet: Sheet1
Figure 7B
		1	2	3	AVE	SD	1	2	3	AVE	SD	1	2	3	AVE	SD	1	2	3	AVE	SD	1	2	3	AVE	SD
	si-NC+Over-NC	0.057	0.106	0.137	0.1	0.0403361	0.195623	0.318793	0.210114	0.24151	0.0673202	0.519581	0.546642	0.557467	0.54123	0.0195143	0.791079	0.985813	0.845468	0.87412	0.100479	1.16288	0.942991	1.3312	1.14569	0.194676
	si-TPX2+over-NC	0.064	0.088	0.148	0.1	0.0432666	0.354701	0.390569	0.45035	0.39854	0.0483204	0.76551	0.790747	0.967403	0.84122	0.110004	1.42811	1.4949	1.70038	1.54113	0.141899	2.34253	2.50782	2.84409	2.56481	0.255593
	si-TPX2+over-MMP13	0.088	0.083	0.129	0.1	0.0252389	0.186325	0.3084	0.469025	0.32125	0.141787	0.539331	0.617695	0.917324	0.69145	0.199498	1.17298	1.19066	1.25172	1.20512	0.0413114	1.66262	1.63903	2.00457	1.76874	0.204577
		0h					24h					48h					72h					96h
	si-NC+Over-NC	0.1094	0.1508	0.2046	450		0.246323	0.383493	0.260414	450		0.597381	0.591742	0.641367	450		0.878279	1.06671	0.940068	450		1.25068	0.995391	1.3958	450
		0.0524	0.0448	0.0676	630		0.0507	0.0647	0.0503	630		0.0778	0.0451	0.0839	630		0.0872	0.0809	0.0946	630		0.0878	0.0524	0.0646	630
	si-TPX2+over-NC	0.155	0.1533	0.2404	450		0.439501	0.478469	0.54505	450		0.84161	0.883447	1.0285	450		1.51161	1.5645	1.78008	450		2.44133	2.55462	2.89399	450
		0.091	0.0653	0.0924	630		0.0848	0.0879	0.0947	630		0.0761	0.0927	0.0611	630		0.0835	0.0696	0.0797	630		0.0988	0.0468	0.0499	630
	si-TPX2+over-MMP13	0.131	0.1434	0.2206	450		0.234025	0.3556	0.541125	450		0.605031	0.686395	0.961524	450		1.24458	1.26416	1.31772	450		1.71772	1.72793	2.08557	450
		0.043	0.0604	0.0916	630		0.0477	0.0472	0.0721	630		0.0657	0.0687	0.0442	630		0.0716	0.0735	0.066	630		0.0551	0.0889	0.081	630
